# Supplementary material for: IgG Expression in Human Colorectal Cancer and Its Relationship to Cancer Cell Behaviors
Source: PubMed Central journal article supplement (PMC3486799; doi:10.1371/journal.pone.0047362), 2012-11-01
Supplement: pone.0047362.s001.pdf [file pone.0047362.s001.pdf]

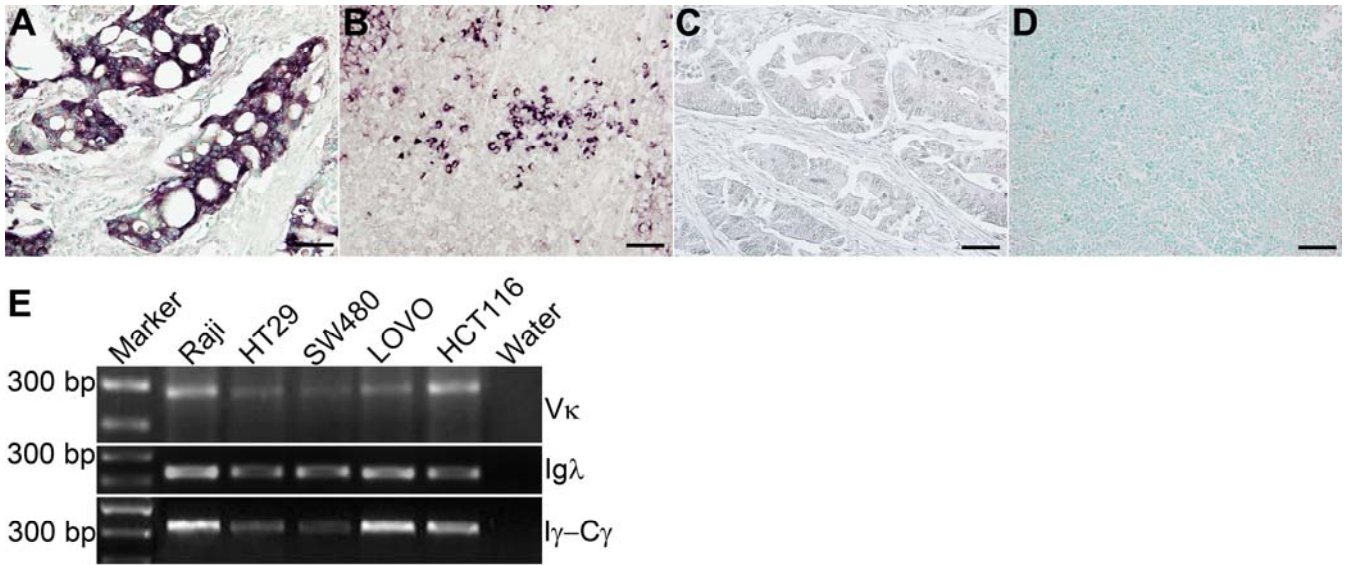

**Figure S1.** In situ hybridization (ISH) and RT-PCR analysis of IgG in CRC. **A:** ISH in which antisense probe for constant region of IgG was applied. **B:** Positive control (lymphatic nodules of the colorectal wall) of ISH of IgG. **C, D:** ISH results in which random probe applied to CRC tissues (**C**) and sense probes applied to tonsil tissue (**D**). Bars, 50 $\mu$ m. **E:** mRNA expression of  $V_{\kappa}$ ,  $Ig\lambda$  and  $I\gamma-C\gamma$  by RT-PCR in four CRC cells.
