# Supplementary material for: IgG Expression in Human Colorectal Cancer and Its Relationship to Cancer Cell Behaviors
Source: PubMed Central journal article supplement (PMC3486799; doi:10.1371/journal.pone.0047362), 2012-11-01
Supplement: pone.0047362.s003.pdf [file pone.0047362.s003.pdf]

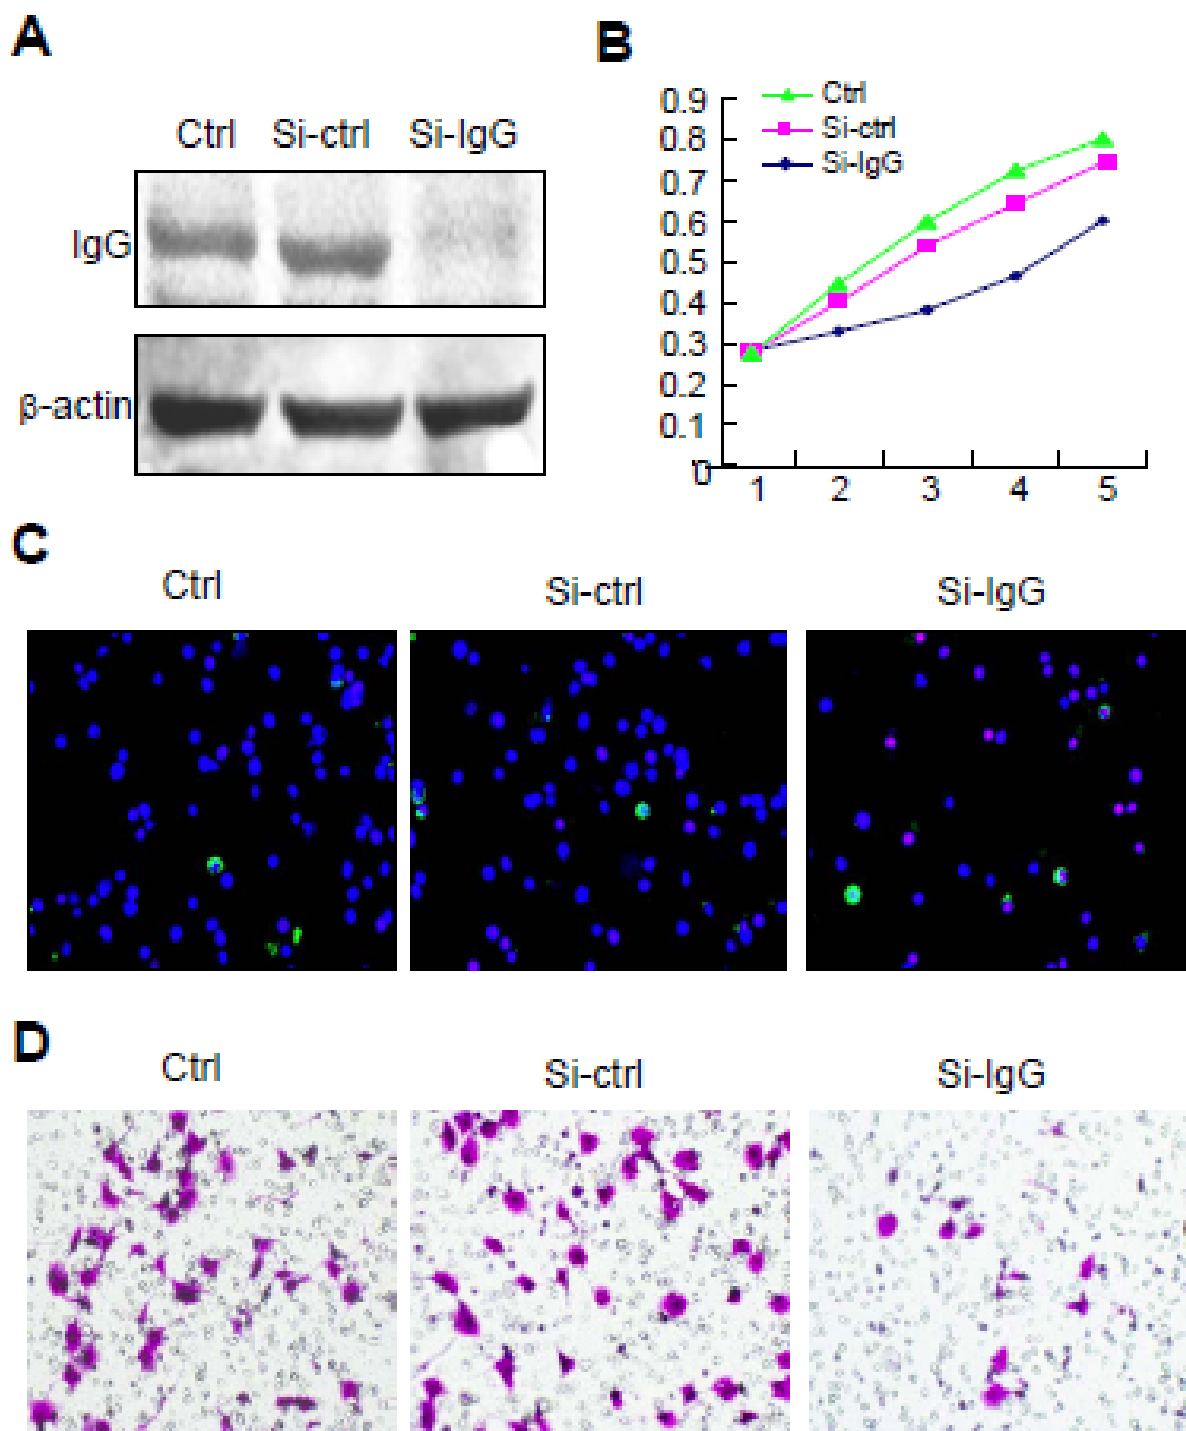

**Figure S3.** Reduction of IgG expression by siRNA affects the biologic behaviors of LOVO cells. **A:** Effect of IgG down-regulation. **B:** MTS assay shows that IgG down-regulation inhibits growth of LOVO cells. **C:** AnnexinV-PI Immunofluorescence double staining analysis shows that the apoptotic LOVO cells when IgG was downregulation, nuclear staining with DAPI. **D:** Invasion assay was carried out with transwell in 24 wells when si-IgG transfected into LOVO cells for 24 hours.
