# Supplementary material for: IgG Expression in Human Colorectal Cancer and Its Relationship to Cancer Cell Behaviors
Source: PubMed Central journal article supplement (PMC3486799; doi:10.1371/journal.pone.0047362), 2012-11-01
Supplement: pone.0047362.s005.pdf [file pone.0047362.s005.pdf]

**Table S2.** Primers for PCR Amplification

| Gene name | Primer sequence 5'-3'                        | Annealing temperature        | Product size (base pairs) |
|-----------|----------------------------------------------|------------------------------|---------------------------|
| IGHG1     | GACTGGCTGAATGGCAAGGAG (sense)                | 56°C                         | 201                       |
|           | GGCGATGTCGCTGGGATAGAA (antisense)            |                              |                           |
| CDR3      | External V3, GAGGTGCAGCTCGAGCAGTCAGG (sense) | Touch down from 62°C to 52°C | 80-110                    |
|           | V4f, CAGGTGCAGCTGCTCGAGTCGGG (sense)         |                              |                           |
|           | V6, CAGGTACAGCTCGAGCAGTCAGG (sense)          |                              |                           |
|           | LJH, TGAGGAGACGGTGACC (antisense)            |                              |                           |
| Igκ       | Internal ACACGGCYSTGTATTACTGT(sense)         | 55°C                         |                           |
|           | GTGACCAGGGTNCCTTGGCCCAAG(antisense)          |                              |                           |
| AID       | TGAGCAAAGCAGACTACGAGA (sense)                | 54°C                         | 231                       |
|           | GGGGTGAGGTGAAAGATGAG (antisense)             |                              |                           |
| RAG1      | External GAAGAGGCGTGACAGTGCT (sense)         | 54°C                         | 294                       |
|           | CGAAATGCGTCTCGTAAGT (antisense)              |                              |                           |
| RAG2      | Internal CCTTTTCACTGGACTTTGG (sense)         | 52°C                         | 327                       |
|           | TGATGGCTATTTGCACCCC (antisense)              |                              |                           |
|           | External TGGATCTTTACCTGAAGATG (sense)        |                              |                           |
|           | CTTGGCTTTCCAGAGAGTCC (antisense)             |                              |                           |
| RAG1      | Internal CACAGCGTTTTGCTGAGCTC (sense)        | 54°C                         |                           |
|           | AGCTTGCCTGAGGGTTCATG (antisense)             |                              |                           |
| RAG2      | External TGGAAGCAACATGGGAAATG (sense)        | 52°C                         | 193                       |
|           | CATCATCTTCATTATAGGTGTC (antisense)           |                              |                           |
| CD19      | Internal TTCTTGGCATAACCAGGAGAC (sense)       | 52°C                         |                           |
|           | CTATTTGCTTCTGCACTG (antisense)               |                              |                           |
| Vκ        | TACTATGGCACTGGCTGCTG (sense)                 | 54°C                         | 218                       |
|           | CACGTTCCCGTACTGGTTCT (antisense)             |                              |                           |
| Iγ- Cγ    | GACATCGAGCTCACCCAGTCTCC (sense)              | 54°C                         | 280-295                   |
|           | GAAATTGAGCTCACGCAGTCTCCA (sense)             |                              |                           |
| Iγ- Cγ    | ACGTTTGAATTCCACCTTGGTCCC (antisense)         | 54°C                         | 332                       |
|           | External GGGCTTCCAAGCCAACAGGGCAGGACA (sense) |                              |                           |
| Iγ- Cγ    | CAAGCTGCTGGAGGGCACGGT (antisense)            | 52°C                         |                           |
|           | Internal GGTGAACCGAGGGGCTTGT (sense)         |                              |                           |
| Iγλ       | CGCTGCTGAGGGAGTAGAGT (antisense)             | 54°C                         | 220                       |
|           | GAGCCTGACGCCTGAG (sense)                     |                              |                           |
| β-actin   | ATTGAGGGTTTATTGAGTGACAG (antisense)          | 54°C                         | 218                       |
|           | TAAAGACCTCTATGCCAACACAG (sense)              |                              |                           |
|           | CACGATGGAGGGGCGGACTCATC (antisense)          |                              |                           |
